# Supplementary material for: Syntheses, characterization, DNA/BSA binding, and in vitro cytostatic activity of fluorobenzenetelluronic triorganotin(iv) esters
Source: Royal Society of Chemistry journal article supplement (doi:10.1039/c9nj00487d), 2019-01-01
Supplement: c9nj00487d1.pdf [file c9nj00487d1.pdf]

**Syntheses, characterizations, DNA / BSA binding, and in vitro  
cytostatic activity of fluorobenzenetelluronic triorganotin(IV) esters**

Shuai Chen, Jia-Jia Nie, Shuo Wang, Qian-Li Li, Ru-Fen Zhang\*, Yong-

Xin Li, Chun-Lin Ma\*

*School of Chemistry and Chemical Engineering, Liaocheng University, Liaocheng, 252059,  
People's Republic of China*

Email: macl856@163.com, macl@lcu.edu.cn

**Supporting Information**

## **Table of contents**

|                                                                                   |           |
|-----------------------------------------------------------------------------------|-----------|
| <b>1. X-ray crystallography (Tables S1-S6) . . . . .</b>                          | <b>3</b>  |
| <b>2. Structures of complexes 1-6 (Figs. S1-S6) . . . . .</b>                     | <b>12</b> |
| <b>3. Supramolecular structures of complexes 1-6 (Figs. S7-S12) . . . . .</b>     | <b>15</b> |
| <b>4. <sup>119</sup>Sn NMR spectra of complexes 1-6 (Figs. S13-S18) . . . . .</b> | <b>17</b> |

## X-ray crystallography

**Table S1.** Selected bond lengths [Å] and angles [°] for complex **1**.

| Complex <b>1</b>  |           |                      |            |
|-------------------|-----------|----------------------|------------|
| Sn(1)-O(3)        | 2.018(4)  | Te(1)-O(3)           | 1.894(4)   |
| Sn(1)-C(7)        | 2.132(10) | Te(1)-O(4)           | 1.924(4)   |
| Sn(1)-C(8)        | 2.136(8)  | Te(1)-O(2)           | 1.949(5)   |
| Sn(1)-C(9)        | 2.146(9)  | Te(1)-O(1)#1         | 1.972(4)   |
| Sn(2)-O(4)        | 2.021(4)  | Te(1)-O(1)           | 1.979(4)   |
| Sn(2)-C(10)       | 2.120(9)  | Te(1)-C(3)           | 2.118(7)   |
| Sn(2)-C(11)       | 2.122(9)  | Te(1)-Te(1)#1        | 3.0443(6)  |
| Sn(2)-C(12)       | 2.129(7)  | Te(2)-O(8)           | 1.900(4)   |
| Sn(3)-O(7)        | 2.015(4)  | Te(2)-O(7)           | 1.927(4)   |
| Sn(3)-C(19)       | 2.122(8)  | Te(2)-O(5)           | 1.952(4)   |
| Sn(3)-C(21)       | 2.122(9)  | Te(2)-O(6)#2         | 1.972(4)   |
| Sn(3)-C(20)       | 2.149(8)  | Te(2)-O(6)           | 1.980(4)   |
| Sn(4)-O(8)        | 2.031(4)  | Te(2)-C(13)          | 2.122(7)   |
| Sn(4)-C(24)       | 2.120(7)  | Te(2)-Te(2)#2        | 3.0383(6)  |
| Sn(4)-C(22)       | 2.125(9)  | O(1)-Te(1)#1         | 1.972(4)   |
| Sn(4)-C(23)       | 2.126(7)  | O(6)-Te(2)#2         | 1.972(4)   |
| O(3)-Sn(1)-C(7)   | 108.6(3)  | O(1)#1-Te(1)-O(1)    | 79.18(17)  |
| O(3)-Sn(1)-C(8)   | 104.0(3)  | O(3)-Te(1)-C(3)      | 96.0(2)    |
| C(7)-Sn(1)-C(8)   | 118.9(4)  | O(4)-Te(1)-C(3)      | 92.3(2)    |
| O(3)-Sn(1)-C(9)   | 96.9(3)   | O(2)-Te(1)-C(3)      | 90.7(2)    |
| C(7)-Sn(1)-C(9)   | 110.8(4)  | O(1)#1-Te(1)-C(3)    | 170.7(2)   |
| C(8)-Sn(1)-C(9)   | 114.8(4)  | O(1)-Te(1)-C(3)      | 91.7(2)    |
| O(4)-Sn(2)-C(10)  | 112.5(3)  | O(3)-Te(1)-Te(1)#1   | 132.81(14) |
| O(4)-Sn(2)-C(11)  | 108.3(3)  | O(4)-Te(1)-Te(1)#1   | 88.97(12)  |
| C(10)-Sn(2)-C(11) | 113.0(3)  | O(2)-Te(1)-Te(1)#1   | 89.37(14)  |
| O(4)-Sn(2)-C(12)  | 96.5(3)   | O(1)#1-Te(1)-Te(1)#1 | 39.68(11)  |
| C(10)-Sn(2)-C(12) | 113.0(3)  | O(1)-Te(1)-Te(1)#1   | 39.51(13)  |
| C(11)-Sn(2)-C(12) | 112.3(3)  | C(3)-Te(1)-Te(1)#1   | 131.2(2)   |
| O(7)-Sn(3)-C(19)  | 107.2(3)  | O(8)-Te(2)-O(7)      | 90.23(17)  |
| O(7)-Sn(3)-C(21)  | 107.6(2)  | O(8)-Te(2)-O(5)      | 89.13(17)  |
| C(19)-Sn(3)-C(21) | 118.5(3)  | O(7)-Te(2)-O(5)      | 177.35(18) |
| O(7)-Sn(3)-C(20)  | 97.9(2)   | O(8)-Te(2)-O(6)#2    | 172.15(18) |
| C(19)-Sn(3)-C(20) | 111.5(3)  | O(7)-Te(2)-O(6)#2    | 89.57(17)  |
| C(21)-Sn(3)-C(20) | 112.1(3)  | O(5)-Te(2)-O(6)#2    | 90.72(16)  |
| O(8)-Sn(4)-C(24)  | 99.1(3)   | O(8)-Te(2)-O(6)      | 92.65(17)  |
| O(8)-Sn(4)-C(22)  | 107.4(3)  | O(7)-Te(2)-O(6)      | 89.36(18)  |
| C(24)-Sn(4)-C(22) | 113.7(4)  | O(5)-Te(2)-O(6)      | 88.10(18)  |
| O(8)-Sn(4)-C(23)  | 106.3(2)  | O(6)#2-Te(2)-O(6)    | 79.49(17)  |
| C(24)-Sn(4)-C(23) | 110.4(3)  | O(8)-Te(2)-C(13)     | 96.0(2)    |
| C(22)-Sn(4)-C(23) | 117.9(3)  | O(7)-Te(2)-C(13)     | 91.0(2)    |

|                    |            |                      |            |
|--------------------|------------|----------------------|------------|
| Te(1)-O(3)-Sn(1)   | 129.5(3)   | O(5)-Te(2)-C(13)     | 91.7(2)    |
| Te(1)-O(4)-Sn(2)   | 123.47(19) | O(6)#2-Te(2)-C(13)   | 91.9(2)    |
| Te(2)#2-O(6)-Te(2) | 100.51(18) | O(6)-Te(2)-C(13)     | 171.4(2)   |
| Te(2)-O(7)-Sn(3)   | 122.4(2)   | O(8)-Te(2)-Te(2)#2   | 132.30(13) |
| Te(2)-O(8)-Sn(4)   | 126.7(2)   | O(7)-Te(2)-Te(2)#2   | 89.31(13)  |
| O(3)-Te(1)-O(4)    | 89.20(18)  | O(5)-Te(2)-Te(2)#2   | 89.23(13)  |
| O(3)-Te(1)-O(2)    | 90.1(2)    | O(6)#2-Te(2)-Te(2)#2 | 39.85(13)  |
| O(4)-Te(1)-O(2)    | 176.95(19) | O(6)-Te(2)-Te(2)#2   | 39.65(11)  |
| O(3)-Te(1)-O(1)#1  | 93.15(18)  | C(13)-Te(2)-Te(2)#2  | 131.71(19) |
| O(4)-Te(1)-O(1)#1  | 89.16(18)  | Te(1)#1-O(1)-Te(1)   | 100.82(19) |
| O(2)-Te(1)-O(1)#1  | 87.93(18)  | C(2)-C(3)-Te(1)      | 121.3(5)   |
| O(3)-Te(1)-O(1)    | 172.20(19) | C(4)-C(3)-Te(1)      | 119.2(6)   |
| O(4)-Te(1)-O(1)    | 89.26(17)  | C(14)-C(13)-Te(2)    | 119.5(5)   |
| O(2)-Te(1)-O(1)    | 91.1(2)    | C(18)-C(13)-Te(2)    | 120.4(5)   |

Symmetry transformations used to generate equivalent atoms: #1 -x,-y,-z+2; #2 -x+1,-y+1,-z+1

**Table S2.** Selected bond lengths [Å] and angles [°] for complex **2**.

| Complex <b>2</b>  |           |                      |            |
|-------------------|-----------|----------------------|------------|
| Sn(2)-O(4)        | 2.020(5)  | Te(1)-O(4)           | 1.890(6)   |
| Sn(2)-C(13)       | 2.128(9)  | Te(1)-O(3)           | 1.905(5)   |
| Sn(2)-C(19)       | 2.135(10) | Te(1)-O(2)           | 1.960(5)   |
| Sn(2)-C(7)        | 2.139(10) | Te(1)-O(1)           | 1.958(5)   |
| Sn(3)-O(3)        | 1.976(6)  | Te(1)-O(2)#1         | 1.965(6)   |
| Sn(3)-C(37)       | 2.117(14) | Te(1)-C(1)           | 2.109(9)   |
| Sn(3)-C(25)       | 2.126(11) | Te(1)-Te(1)#1        | 3.0240(7)  |
| Sn(3)-C(31)       | 2.132(12) | O(2)-Te(1)#1         | 1.965(6)   |
| O(4)-Sn(2)-C(13)  | 111.8(3)  | Te(1)-O(4)-Sn(2)     | 122.9(3)   |
| O(4)-Sn(2)-C(19)  | 97.5(4)   | O(4)-Te(1)-O(3)      | 91.0(2)    |
| C(13)-Sn(2)-C(19) | 109.6(4)  | O(4)-Te(1)-O(2)      | 92.8(2)    |
| O(4)-Sn(2)-C(7)   | 110.7(3)  | O(3)-Te(1)-O(2)      | 88.9(3)    |
| C(13)-Sn(2)-C(7)  | 118.0(4)  | O(4)-Te(1)-O(1)      | 87.3(2)    |
| C(19)-Sn(2)-C(7)  | 107.2(4)  | O(3)-Te(1)-O(1)      | 176.0(3)   |
| O(3)-Sn(3)-C(37)  | 113.1(4)  | O(2)-Te(1)-O(1)      | 87.6(2)    |
| O(3)-Sn(3)-C(25)  | 114.2(4)  | O(4)-Te(1)-O(2)#1    | 172.0(2)   |
| C(37)-Sn(3)-C(25) | 109.5(5)  | O(3)-Te(1)-O(2)#1    | 89.1(2)    |
| O(3)-Sn(3)-C(31)  | 95.5(4)   | O(2)-Te(1)-O(2)#1    | 79.2(2)    |
| C(37)-Sn(3)-C(31) | 112.2(6)  | O(1)-Te(1)-O(2)#1    | 92.1(2)    |
| C(25)-Sn(3)-C(31) | 111.9(5)  | O(4)-Te(1)-C(1)      | 96.8(3)    |
| C(8)-C(7)-Sn(2)   | 119.3(9)  | O(3)-Te(1)-C(1)      | 92.5(3)    |
| C(12)-C(7)-Sn(2)  | 122.6(8)  | O(2)-Te(1)-C(1)      | 170.3(3)   |
| C(18)-C(13)-Sn(2) | 118.1(8)  | O(1)-Te(1)-C(1)      | 91.3(3)    |
| C(14)-C(13)-Sn(2) | 123.5(8)  | O(2)#1-Te(1)-C(1)    | 91.2(3)    |
| C(24)-C(19)-Sn(2) | 123.0(9)  | O(4)-Te(1)-Te(1)#1   | 132.48(15) |
| C(20)-C(19)-Sn(2) | 119.2(9)  | O(3)-Te(1)-Te(1)#1   | 88.7(2)    |
| C(26)-C(25)-Sn(3) | 124.2(8)  | O(2)-Te(1)-Te(1)#1   | 39.66(17)  |
| C(30)-C(25)-Sn(3) | 116.7(9)  | O(1)-Te(1)-Te(1)#1   | 89.82(19)  |
| C(32)-C(31)-Sn(3) | 119.3(10) | O(2)#1-Te(1)-Te(1)#1 | 39.53(15)  |
| C(36)-C(31)-Sn(3) | 121.5(11) | C(1)-Te(1)-Te(1)#1   | 130.7(3)   |
| C(42)-C(37)-Sn(3) | 121.2(11) | Te(1)-O(2)-Te(1)#1   | 100.8(3)   |
| C(38)-C(37)-Sn(3) | 116.9(12) | C(6)-C(1)-Te(1)      | 120.6(7)   |
| Te(1)-O(3)-Sn(3)  | 132.8(3)  | C(2)-C(1)-Te(1)      | 118.7(8)   |

Symmetry transformations used to generate equivalent atoms: #1 -x,-y,-z+1

**Table S3.** Selected bond lengths [Å] and angles [°] for complex **3**.

| Complex <b>3</b>   |           |                      |            |
|--------------------|-----------|----------------------|------------|
| Sn(1)-O(4)         | 2.023(10) | Te(1)-O(3)           | 1.893(10)  |
| Sn(1)-C(11)        | 2.05(2)   | Te(1)-O(4)           | 1.900(10)  |
| Sn(1)-C(12)        | 2.077(18) | Te(1)-O(1)           | 1.927(11)  |
| Sn(1)-C(10)        | 2.12(2)   | Te(1)-O(2)           | 1.939(10)  |
| Sn(2)-O(3)         | 1.996(11) | Te(1)-O(2)#1         | 1.968(9)   |
| Sn(2)-C(7)         | 2.10(2)   | Te(1)-C(1)           | 2.13(2)    |
| Sn(2)-C(8)         | 2.10(2)   | Te(1)-Te(1)#1        | 3.0053(14) |
| Sn(2)-C(9)         | 2.13(2)   | Te(2)-O(8)           | 1.883(10)  |
| Sn(3)-O(7)         | 1.980(11) | Te(2)-O(7)           | 1.906(10)  |
| Sn(3)-C(21)        | 2.10(2)   | Te(2)-O(5)           | 1.945(11)  |
| Sn(3)-C(19)        | 2.11(2)   | Te(2)-O(6)           | 1.962(10)  |
| Sn(3)-C(20)        | 2.12(2)   | Te(2)-O(6)#2         | 1.954(11)  |
| Sn(4)-O(8)         | 2.004(11) | Te(2)-C(13)          | 2.12(2)    |
| Sn(4)-C(22)        | 2.08(3)   | Te(2)-Te(2)#2        | 3.0114(14) |
| Sn(4)-C(24)        | 2.13(3)   | O(2)-Te(1)#1         | 1.968(9)   |
| Sn(4)-C(23)        | 2.16(3)   | O(6)-Te(2)#2         | 1.954(11)  |
| O(4)-Sn(1)-C(11)   | 97.7(7)   | O(2)-Te(1)-O(2)#1    | 79.4(4)    |
| O(4)-Sn(1)-C(12)   | 107.0(7)  | O(3)-Te(1)-C(1)      | 95.7(6)    |
| C(11)-Sn(1)-C(12)  | 115.5(9)  | O(4)-Te(1)-C(1)      | 91.8(6)    |
| O(4)-Sn(1)-C(10)   | 110.5(7)  | O(1)-Te(1)-C(1)      | 90.0(7)    |
| C(11)-Sn(1)-C(10)  | 110.4(9)  | O(2)-Te(1)-C(1)      | 171.2(6)   |
| C(12)-Sn(1)-C(10)  | 114.3(9)  | O(2)#1-Te(1)-C(1)    | 92.1(6)    |
| O(3)-Sn(2)-C(7)    | 107.1(8)  | O(3)-Te(1)-Te(1)#1   | 132.9(3)   |
| O(3)-Sn(2)-C(8)    | 107.3(7)  | O(4)-Te(1)-Te(1)#1   | 89.7(3)    |
| C(7)-Sn(2)-C(8)    | 118.6(9)  | O(1)-Te(1)-Te(1)#1   | 89.1(3)    |
| O(3)-Sn(2)-C(9)    | 96.2(7)   | O(2)-Te(1)-Te(1)#1   | 40.1(3)    |
| C(7)-Sn(2)-C(9)    | 110.6(8)  | O(2)#1-Te(1)-Te(1)#1 | 39.4(2)    |
| C(8)-Sn(2)-C(9)    | 114.2(9)  | C(1)-Te(1)-Te(1)#1   | 131.4(5)   |
| O(7)-Sn(3)-C(21)   | 110.6(7)  | O(8)-Te(2)-O(7)      | 88.9(5)    |
| O(7)-Sn(3)-C(19)   | 106.6(7)  | O(8)-Te(2)-O(5)      | 90.0(5)    |
| C(21)-Sn(3)-C(19)  | 112.6(9)  | O(7)-Te(2)-O(5)      | 178.1(5)   |
| O(7)-Sn(3)-C(20)   | 98.6(7)   | O(8)-Te(2)-O(6)      | 172.2(5)   |
| C(21)-Sn(3)-C(20)  | 111.6(9)  | O(7)-Te(2)-O(6)      | 90.6(4)    |
| C(19)-Sn(3)-C(20)  | 115.8(9)  | O(5)-Te(2)-O(6)      | 90.3(5)    |
| O(8)-Sn(4)-C(22)   | 105.1(8)  | O(8)-Te(2)-O(6)#2    | 92.7(5)    |
| O(8)-Sn(4)-C(24)   | 96.4(8)   | O(7)-Te(2)-O(6)#2    | 90.4(5)    |
| C(22)-Sn(4)-C(24)  | 111.9(10) | O(5)-Te(2)-O(6)#2    | 88.1(5)    |
| C(22)-Sn(4)-C(23)  | 120.3(10) | O(6)-Te(2)-O(6)#2    | 79.5(5)    |
| C(24)-Sn(4)-C(23)  | 112.8(10) | O(8)-Te(2)-C(13)     | 95.8(6)    |
| Te(1)-O(3)-Sn(2)   | 126.9(6)  | O(7)-Te(2)-C(13)     | 93.1(6)    |
| Te(1)-O(4)-Sn(1)   | 123.8(5)  | O(5)-Te(2)-C(13)     | 88.6(6)    |
| Te(2)-O(6)-Te(2)#2 | 100.5(5)  | O(6)-Te(2)-C(13)     | 92.0(6)    |

|                   |          |                      |           |
|-------------------|----------|----------------------|-----------|
| Te(2)-O(7)-Sn(3)  | 126.4(6) | O(6)#2-Te(2)-C(13)   | 170.9(6)  |
| Te(2)-O(8)-Sn(4)  | 123.9(6) | O(8)-Te(2)-Te(2)#2   | 132.6(3)  |
| O(3)-Te(1)-O(4)   | 89.9(5)  | O(7)-Te(2)-Te(2)#2   | 90.7(3)   |
| O(3)-Te(1)-O(1)   | 90.1(5)  | O(5)-Te(2)-Te(2)#2   | 89.0(3)   |
| O(4)-Te(1)-O(1)   | 178.2(5) | O(6)-Te(2)-Te(2)#2   | 39.6(3)   |
| O(3)-Te(1)-O(2)   | 92.9(4)  | O(6)#2-Te(2)-Te(2)#2 | 39.9(3)   |
| O(4)-Te(1)-O(2)   | 90.3(5)  | C(13)-Te(2)-Te(2)#2  | 131.6(5)  |
| O(1)-Te(1)-O(2)   | 87.9(5)  | Te(1)-O(2)-Te(1)#1   | 100.6(5)  |
| O(3)-Te(1)-O(2)#1 | 172.2(4) | C(6)-C(1)-Te(1)      | 120.8(17) |
| O(4)-Te(1)-O(2)#1 | 89.2(4)  | C(2)-C(1)-Te(1)      | 117.7(14) |
| O(1)-Te(1)-O(2)#1 | 90.6(5)  | O(8)-Sn(4)-C(23)     | 106.9(7)  |

Symmetry transformations used to generate equivalent atoms: #1  $-x+2,-y+1,-z+1$ ; #2  $-x+1,-y+2,-z+1$

**Table S4.** Selected bond lengths [Å] and angles [°] for complex **4**.

| Complex <b>4</b>    |            |                      |            |
|---------------------|------------|----------------------|------------|
| Te(1)-Sn(1)         | 3.4281(7)  | Sn(1)-(O1)           | 2.009(4)   |
| Te(1)-Sn(2)         | 3.5187(8)  | Sn(1)-(C7)           | 2.136(8)   |
| Te(1)-O(1)          | 1.889(5)   | Sn(1)-(C13)          | 2.128(7)   |
| Te(1)-O(2)          | 1.956(5)   | Sn(1)-(C19)          | 2.129(8)   |
| Te(1)-O(3)          | 1.966(4)   | Sn(2)-(O4)           | 1.992(5)   |
| Te(1)-O(4)          | 1.912(5)   | Sn(2)-(C25)          | 2.135(9)   |
| Te(1)-C(1)          | 2.103(7)   | Sn(2)-(C31)          | 2.125(8)   |
| Te(1)-Te(1)#1       | 3.0193(6)  | Sn(2)-(C37)          | 2.128(8)   |
| Te(1)-O(3)#1        | 1.961(4)   |                      |            |
| Sn(1)-Te(1)-Sn(2)   | 93.33(2)   | Te(1)#1-Te(1)-O(3)   | 39.70(11)  |
| Sn(1)-Te(1)-O(1)    | 29.40(14)  | O(3)-Te(1)-O(3)#1    | 79.51(17)  |
| Sn(1)-Te(1)-O(2)    | 59.29(14)  | O(4)-Te(1)-C(1)      | 91.4(3)    |
| Sn(1)-Te(1)-O(3)    | 146.90(12) | Te(1)#1-Te(1)-O(4)   | 89.70(14)  |
| Sn(1)-Te(1)-O(4)    | 118.71(14) | O(3)#1 -Te(1)-O(4)   | 89.8(2)    |
| Te(1)#1-Te(1)-Sn(1) | 118.36(2)  | Te(1)#1-Te(1)-C(1)   | 130.5(2)   |
| Sn(1)-Te(1)-O(3)#1  | 83.77(12)  | O(3)#1-Te(1)-C(1)    | 170.2(3)   |
| Sn(2)-Te(1)-O(1)    | 67.78(14)  | Te(1)#1-Te(1)-O(3)#1 | 39.81(13)  |
| Sn(2)-Te(1)-O(2)    | 151.19(14) | Te(1)-Sn(1)-O(1)     | 27.48(14)  |
| Sn(2)-Te(1)-O(3)    | 111.33(13) | Te(1)-Sn(1)-C(7)     | 123.46(19) |
| Sn(2)-Te(1)-O(4)    | 26.25(14)  | Te(1)-Sn(1)-C(13)    | 95.14(19)  |
| Te(1)#1-Te(1)-Sn(2) | 96.96(2)   | Te(1)-Sn(1)-C(19)    | 103.8(2)   |
| Sn(2)-Te(1)-O(3)#1  | 79.75(14)  | O(1)-Sn(1)-C(7)      | 96.3(2)    |
| O(1)-Te(1)-O(2)     | 87.3(2)    | O(1)-Sn(1)-C(13)     | 111.9(2)   |
| O(1)-Te(1)-O(3)     | 172.81(18) | O(1)-Sn(1)-C(19)     | 112.2(3)   |
| O(1)-Te(1)-O(4)     | 91.1(2)    | C(7)-Sn(1)-C(13)     | 111.5(3)   |
| Te(1)#1-Te(1)-O(1)  | 133.15(15) | C(7)-Sn(1)-C(19)     | 107.1(3)   |
| O(1)-Te(1)-O(3)#1   | 93.34(19)  | C(13)-Sn(1)-C(19)    | 116.0(3)   |
| O(2)-Te(1)-O(3)     | 91.55(19)  | Te(1)-Sn(2)-O(4)     | 25.11(13)  |
| O(2)-Te(1)-O(4)     | 177.1(2)   | Te(1)-Sn(2)-C(25)    | 119.9(3)   |
| Te(1)#1-Te(1)-O(2)  | 89.62(14)  | Te(1)-Sn(2)-C(31)    | 95.0(2)    |
| O(2)-Te(1)-O(3)#1   | 87.87(19)  | Te(1)-Sn(2)-C(37)    | 103.0(2)   |
| O(3)-Te(1)-O(4)     | 89.74(19)  | O(4)-Sn(2)-C(25)     | 97.5(3)    |
| C(25)-Sn(2)-C(31)   | 109.6(3)   | O(4)-Sn(2)-C(31)     | 115.3(3)   |
| C(25)-Sn(2)-C(37)   | 113.7(3)   | O(4)-Sn(2)-C(37)     | 105.0(3)   |
| C(31)-Sn(2)-C(37)   | 114.5(3)   |                      |            |

Symmetry transformations used to generate equivalent atoms: #1 1-x,1-y,1-z



**Table S5.** Selected bond lengths [Å] and angles [°] for complex **5**.

| Complex <b>5</b>  |           |                      |            |
|-------------------|-----------|----------------------|------------|
| Sn(1)-O(4)        | 2.006(6)  | Te(1)-O(3)           | 1.881(6)   |
| Sn(1)-C(2)        | 2.121(13) | Te(1)-O(4)           | 1.900(6)   |
| Sn(1)-C(1)        | 2.128(12) | Te(1)-O(1)           | 1.948(6)   |
| Sn(1)-C(3)        | 2.142(13) | Te(1)-O(2)#1         | 1.960(6)   |
| Sn(2)-O(3)        | 2.007(6)  | Te(1)-O(2)           | 1.962(6)   |
| Sn(2)-C(14)       | 2.104(12) | Te(1)-C(8)           | 2.125(9)   |
| Sn(2)-C(15)       | 2.137(11) | Te(1)-Te(1)#1        | 3.0189(12) |
| Sn(2)-C(10)       | 2.149(11) | O(2)-Te(1)#1         | 1.960(6)   |
| O(4)-Sn(1)-C(2)   | 108.5(4)  | O(1)-Te(1)-O(2)#1    | 90.1(3)    |
| O(4)-Sn(1)-C(1)   | 110.4(4)  | O(3)-Te(1)-O(2)      | 92.3(3)    |
| C(2)-Sn(1)-C(1)   | 113.0(6)  | O(4)-Te(1)-O(2)      | 91.3(3)    |
| O(4)-Sn(1)-C(3)   | 94.6(4)   | O(1)-Te(1)-O(2)      | 88.2(3)    |
| C(2)-Sn(1)-C(3)   | 115.6(6)  | O(2)#1-Te(1)-O(2)    | 79.3(3)    |
| C(1)-Sn(1)-C(3)   | 113.1(6)  | O(3)-Te(1)-C(8)      | 97.0(3)    |
| O(3)-Sn(2)-C(14)  | 105.6(4)  | O(4)-Te(1)-C(8)      | 92.7(3)    |
| O(3)-Sn(2)-C(15)  | 96.9(4)   | O(1)-Te(1)-C(8)      | 87.7(3)    |
| C(14)-Sn(2)-C(15) | 116.5(6)  | O(2)#1-Te(1)-C(8)    | 91.3(3)    |
| O(3)-Sn(2)-C(10)  | 109.3(4)  | O(2)-Te(1)-C(8)      | 169.8(3)   |
| C(14)-Sn(2)-C(10) | 113.8(5)  | O(3)-Te(1)-Te(1)#1   | 131.9(2)   |
| C(15)-Sn(2)-C(10) | 112.8(5)  | O(4)-Te(1)-Te(1)#1   | 90.6 (2)   |
| Te(1)-O(3)-Sn(2)  | 126.7(3)  | O(1)-Te(1)-Te(1)#1   | 88.94(19)  |
| Te(1)-O(4)-Sn(1)  | 127.6(3)  | O(2)#1-Te(1)-Te(1)#1 | 39.70(16)  |
| O(3)-Te(1)-O(4)   | 90.4(3)   | O(2)-Te(1)-Te(1)#1   | 39.63(18)  |
| O(3)-Te(1)-O(1)   | 89.9(3)   | C(8)-Te(1)-Te(1)#1   | 130.9(3)   |
| O(4)-Te(1)-O(1)   | 179.5(3)  | Te(1)#1-O(2)-Te(1)   | 100.7(3)   |
| O(3)-Te(1)-O(2)#1 | 171.6(3)  | C(9)-C(8)-Te(1)      | 120.5(7)   |
| O(4)-Te(1)-O(2)#1 | 89.6(3)   | C(12)-C(8)-Te(1)     | 119.3(7)   |

Symmetry transformations used to generate equivalent atoms: #1 -x,-y,-z

**Table S6.** Selected bond lengths [Å] and angles [°] for complex **6**.

| Complex <b>6</b>  |           |                  |            |
|-------------------|-----------|------------------|------------|
| Sn(1)-O(3)        | 2.004(6)  | Sn(4)-C(79)      | 2.136(12)  |
| Sn(1)-C(31)       | 2.104(12) | Te(1)-O(3)       | 1.888(6)   |
| Sn(1)-C(37)       | 2.112(11) | Te(1)-O(4)       | 1.903(6)   |
| Sn(1)-C(25)       | 2.127(10) | Te(1)-O(1)       | 1.958(6)   |
| Sn(2)-O(4)        | 1.992(6)  | Te(1)-O(5)       | 1.967(6)   |
| Sn(2)-C(19)       | 2.115(11) | Te(1)-O(6)       | 1.971(6)   |
| Sn(2)-C(7)        | 2.103(11) | Te(1)-C(1)       | 2.124(10)  |
| Sn(2)-C(13)       | 2.132(11) | Te(1)-Te(2)      | 3.024(9)   |
| Sn(3)-O(8)        | 1.988(6)  | Te(2)-O(7)       | 1.882(5)   |
| Sn(3)-C(49)       | 2.083(10) | Te(2)-O(8)       | 1.891(6)   |
| Sn(3)-C(61)       | 2.116(12) | Te(2)-O(2)       | 1.940(6)   |
| Sn(3)-C(55)       | 2.152(12) | Te(2)-O(6)       | 1.961(6)   |
| Sn(4)-O(7)        | 2.022(6)  | Te(2)-O(5)       | 1.968(6)   |
| Sn(4)-C(67)       | 2.098(11) | Te(2)-C(43)      | 2.125(9)   |
| Sn(4)-C(73)       | 2.100(12) |                  |            |
| O(3)-Sn(1)-C(31)  | 111.0(4)  | O(3)-Te(1)-O(4)  | 91.3(2)    |
| O(3)-Sn(1)-C(37)  | 113.6(3)  | O(3)-Te(1)-O(1)  | 87.7(2)    |
| C(31)-Sn(1)-C(37) | 112.1(5)  | O(4)-Te(1)-O(1)  | 177.2(3)   |
| O(3)-Sn(1)-C(25)  | 99.2(3)   | O(3)-Te(1)-O(5)  | 92.9(2)    |
| C(31)-Sn(1)-C(25) | 110.3(4)  | O(4)-Te(1)-O(5)  | 88.3(2)    |
| C(37)-Sn(1)-C(25) | 109.8(4)  | O(1)-Te(1)-O(5)  | 89.2(2)    |
| O(4)-Sn(2)-C(19)  | 95.4(3)   | O(3)-Te(1)-O(6)  | 172.0(2)   |
| O(4)-Sn(2)-C(7)   | 109.5(4)  | O(4)-Te(1)-O(6)  | 89.4(2)    |
| C(19)-Sn(2)-C(7)  | 113.0(4)  | O(1)-Te(1)-O(6)  | 91.2(2)    |
| O(4)-Sn(2)-C(13)  | 111.3(4)  | O(5)-Te(1)-O(6)  | 79.2(2)    |
| C(19)-Sn(2)-C(13) | 111.8(4)  | O(3)-Te(1)-C(1)  | 96.8(3)    |
| C(7)-Sn(2)-C(13)  | 114.3(4)  | O(4)-Te(1)-C(1)  | 92.5(3)    |
| O(8)-Sn(3)-C(49)  | 106.9(4)  | O(1)-Te(1)-C(1)  | 90.2(3)    |
| O(8)-Sn(3)-C(61)  | 113.2(4)  | O(5)-Te(1)-C(1)  | 170.3(3)   |
| C(49)-Sn(3)-C(61) | 113.8(5)  | O(6)-Te(1)-C(1)  | 91.1(3)    |
| O(8)-Sn(3)-C(55)  | 94.3(4)   | O(3)-Te(1)-Te(2) | 132.56(17) |
| C(49)-Sn(3)-C(55) | 116.9(5)  | O(4)-Te(1)-Te(2) | 87.91(16)  |
| C(61)-Sn(3)-C(55) | 110.2(5)  | O(1)-Te(1)-Te(2) | 90.88(17)  |
| O(7)-Sn(4)-C(67)  | 110.4(4)  | O(5)-Te(1)-Te(2) | 39.71(15)  |
| O(7)-Sn(4)-C(73)  | 96.9(4)   | O(6)-Te(1)-Te(2) | 39.46(15)  |
| C(67)-Sn(4)-C(73) | 107.9(5)  | C(1)-Te(1)-Te(2) | 130.6(3)   |
| O(7)-Sn(4)-C(79)  | 111.5(4)  | O(7)-Te(2)-O(8)  | 92.0(2)    |
| C(67)-Sn(4)-C(79) | 117.2(5)  | O(7)-Te(2)-O(2)  | 88.2(2)    |
| C(73)-Sn(4)-C(79) | 110.9(5)  | O(8)-Te(2)-O(2)  | 179.3(3)   |
| Te(2)-O(7)-Sn(4)  | 122.4(3)  | O(7)-Te(2)-O(6)  | 93.7(2)    |
| Te(2)-O(8)-Sn(3)  | 132.8(3)  | O(8)-Te(2)-O(6)  | 90.4(2)    |
| C(8)-C(7)-Sn(2)   | 121.9(8)  | O(2)-Te(2)-O(6)  | 88.9(2)    |

|                   |           |                   |            |
|-------------------|-----------|-------------------|------------|
| C(12)-C(7)-Sn(2)  | 120.1(8)  | O(7)-Te(2)-O(5)   | 173.2(2)   |
| C(14)-C(13)-Sn(2) | 123.8(9)  | O(8)-Te(2)-O(5)   | 89.1(3)    |
| C(18)-C(13)-Sn(2) | 116.2(9)  | O(2)-Te(2)-O(5)   | 90.6(3)    |
| C(24)-C(19)-Sn(2) | 121.3(9)  | O(6)-Te(2)-O(5)   | 79.6(2)    |
| C(20)-C(19)-Sn(2) | 122.4(9)  | O(7)-Te(2)-C(43)  | 96.2(3)    |
| C(30)-C(25)-Sn(1) | 120.9(8)  | O(8)-Te(2)-C(43)  | 91.1(3)    |
| C(26)-C(25)-Sn(1) | 120.7(8)  | O(2)-Te(2)-C(43)  | 89.6(3)    |
| C(36)-C(31)-Sn(1) | 121.7(10) | O(6)-Te(2)-C(43)  | 169.9(3)   |
| C(32)-C(31)-Sn(1) | 119.7(10) | O(5)-Te(2)-C(43)  | 90.5(3)    |
| C(42)-C(37)-Sn(1) | 118.4(9)  | O(7)-Te(2)-Te(1)  | 133.47(17) |
| C(38)-C(37)-Sn(1) | 127.9(9)  | O(8)-Te(2)-Te(1)  | 90.3(2)    |
| C(50)-C(49)-Sn(3) | 124.5(9)  | O(2)-Te(2)-Te(1)  | 89.04(18)  |
| C(54)-C(49)-Sn(3) | 124.3(9)  | O(6)-Te(2)-Te(1)  | 39.83(14)  |
| C(56)-C(55)-Sn(3) | 122.5(10) | O(5)-Te(2)-Te(1)  | 39.75(16)  |
| C(60)-C(55)-Sn(3) | 120.8(9)  | C(43)-Te(2)-Te(1) | 130.2(3)   |
| C(72)-C(67)-Sn(4) | 119.2(9)  | Te(1)-O(3)-Sn(1)  | 125.4(3)   |
| C(68)-C(67)-Sn(4) | 125.2(9)  | Te(1)-O(4)-Sn(2)  | 130.9(3)   |
| C(78)-C(73)-Sn(4) | 124.0(10) | Te(2)-O(5)-Te(1)  | 100.5(2)   |
| C(74)-C(73)-Sn(4) | 121.5(10) | Te(2)-O(6)-Te(1)  | 100.7(2)   |
| C(66)-C(61)-Sn(3) | 118.6(10) | C(6)-C(1)-Te(1)   | 120.4(8)   |
| C(62)-C(61)-Sn(3) | 124.1(10) | C(2)-C(1)-Te(1)   | 116.2(8)   |
| C(84)-C(79)-Sn(4) | 122.0(10) | C(48)-C(43)-Te(2) | 120.0(7)   |
| C(80)-C(79)-Sn(4) | 119.5(10) | C(44)-C(43)-Te(2) | 119.1(7)   |

## Structures of complexes 1-6

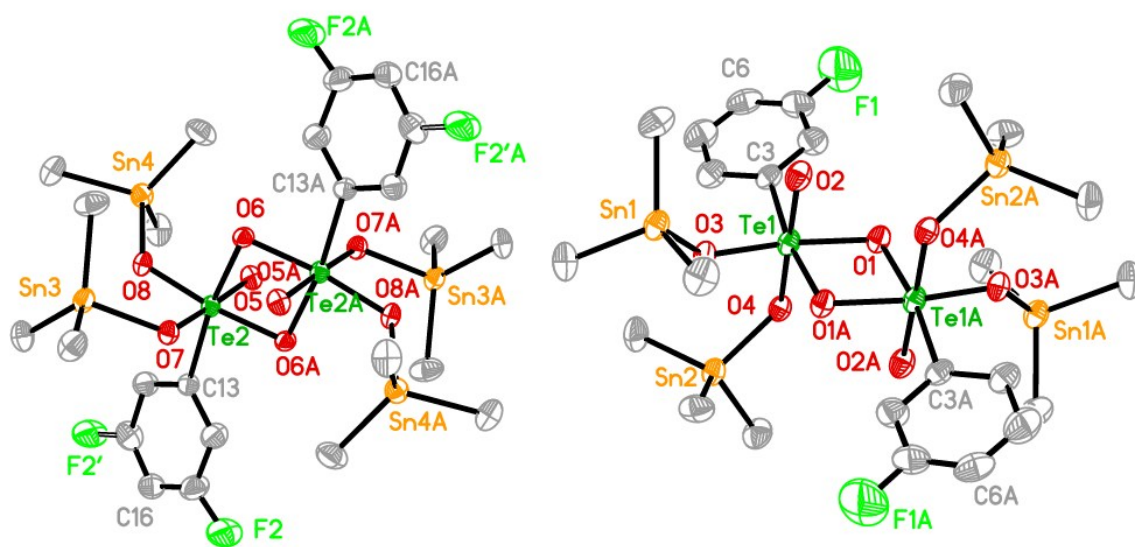

Fig. S1. Molecular structure of complex 1.

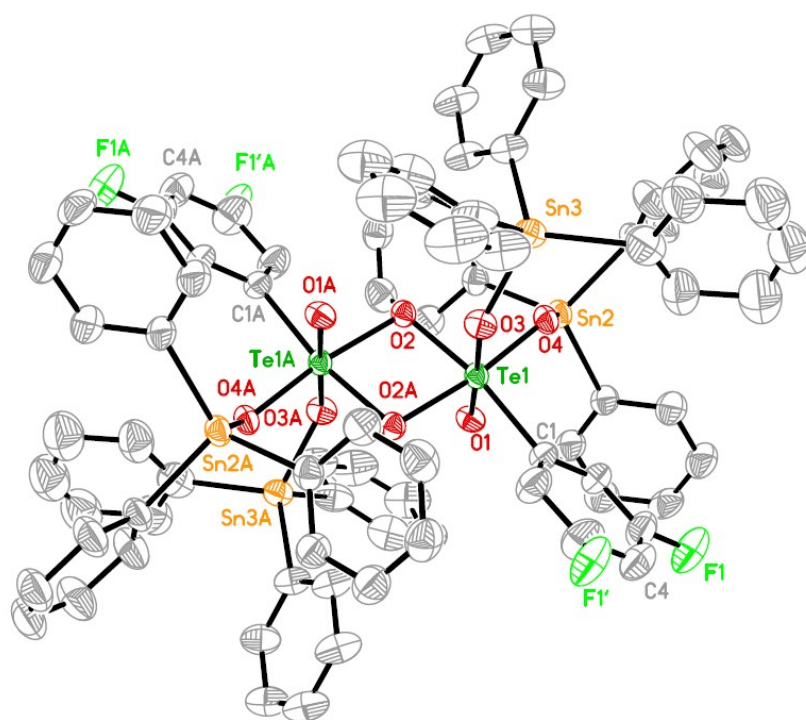

Fig. S2. Molecular structure of complex 2.

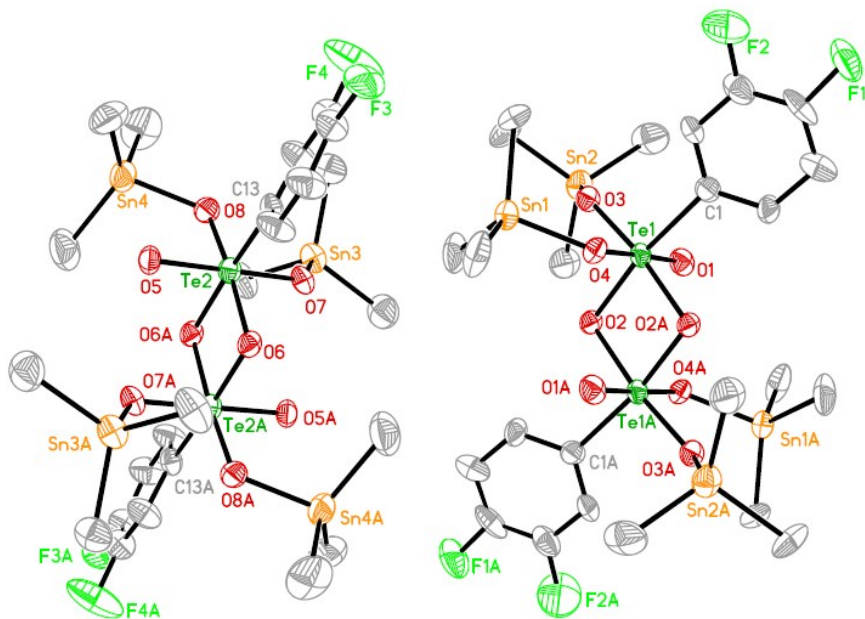

Fig. S3. Molecular structure of complex 3.

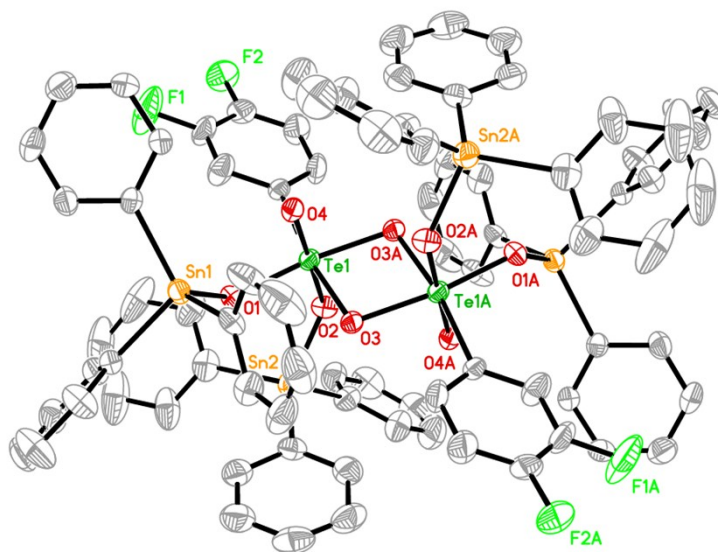

Fig. S4. Molecular structure of complex 4.

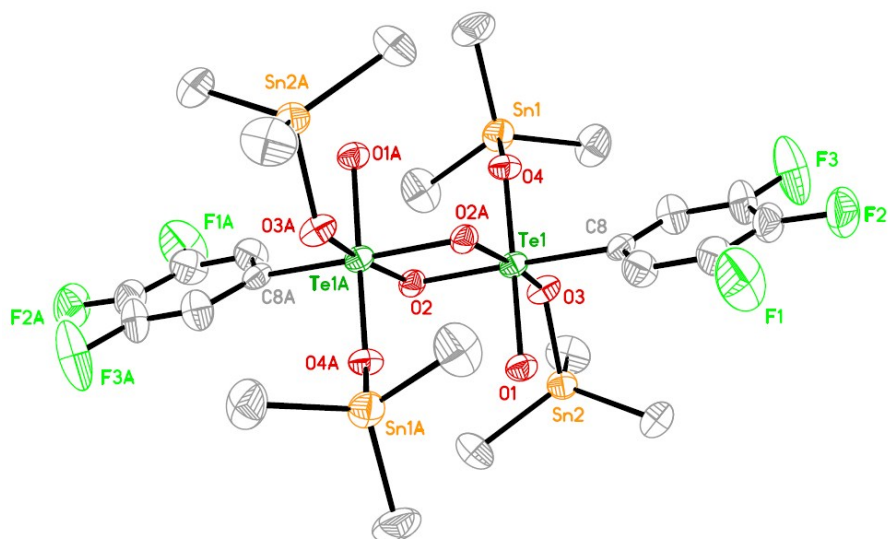

Fig. S5. Molecular structure of complex 5.

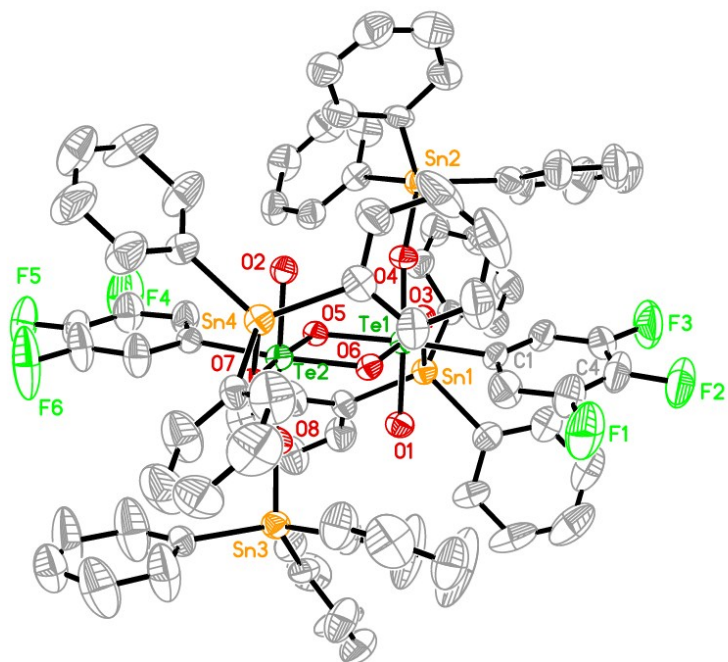

Fig. S6. Molecular structure of complex 6.

## Supramolecular structures of complexes 1-6

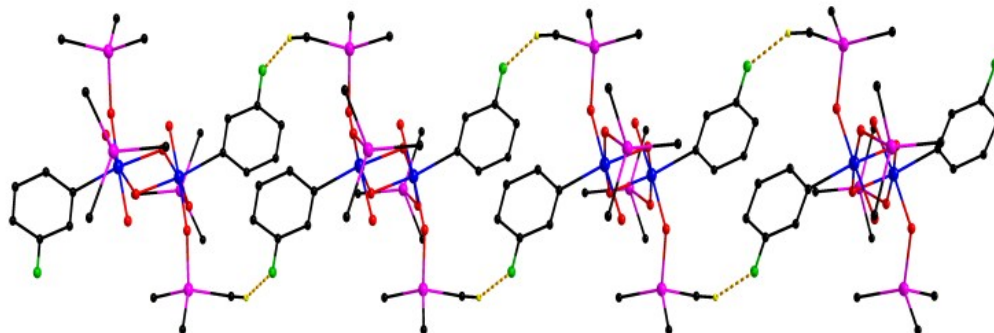

Fig. S7. 1D polymeric chain of complex **1** made up of intermolecular C-H...F interactions.

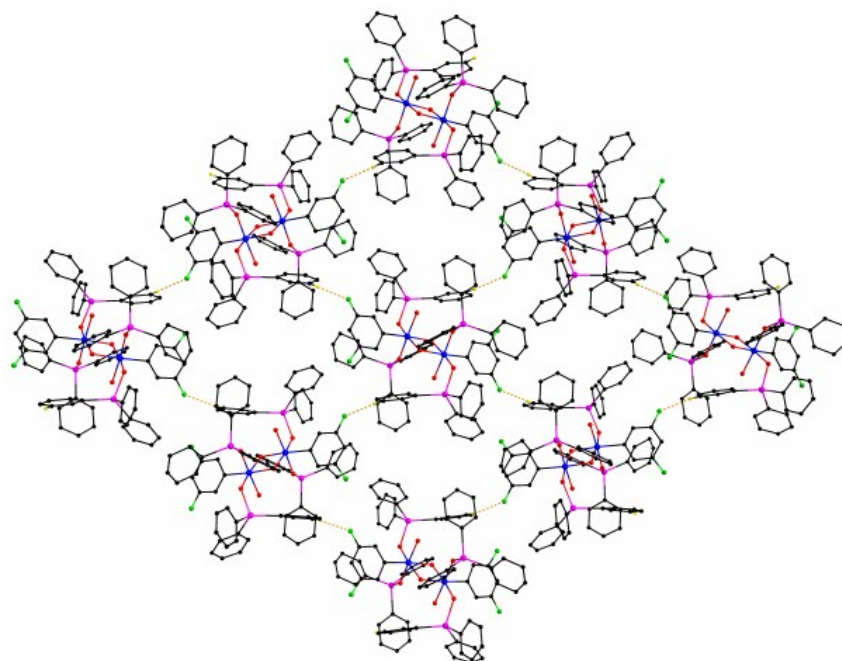

Fig. S8. 2D network structures of complex **2** made up of intermolecular C-H...F interactions.

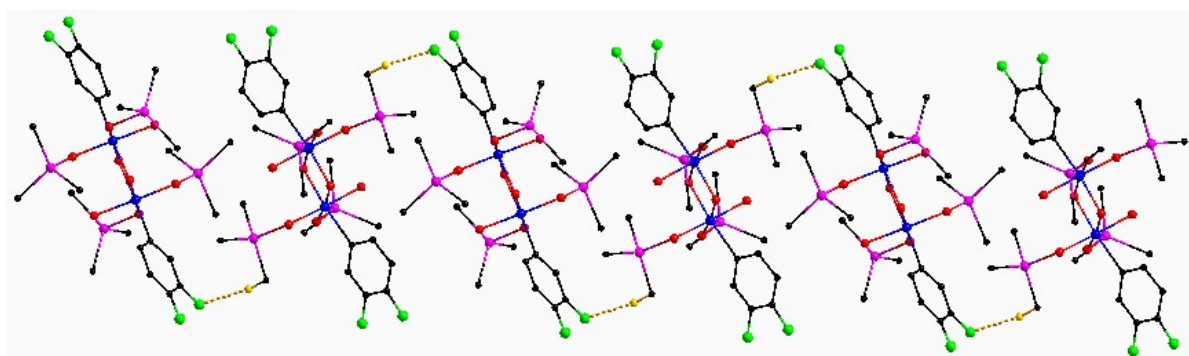

Fig. S9. 1D chain structures of complex **3** made up of intermolecular C-H...F interactions.

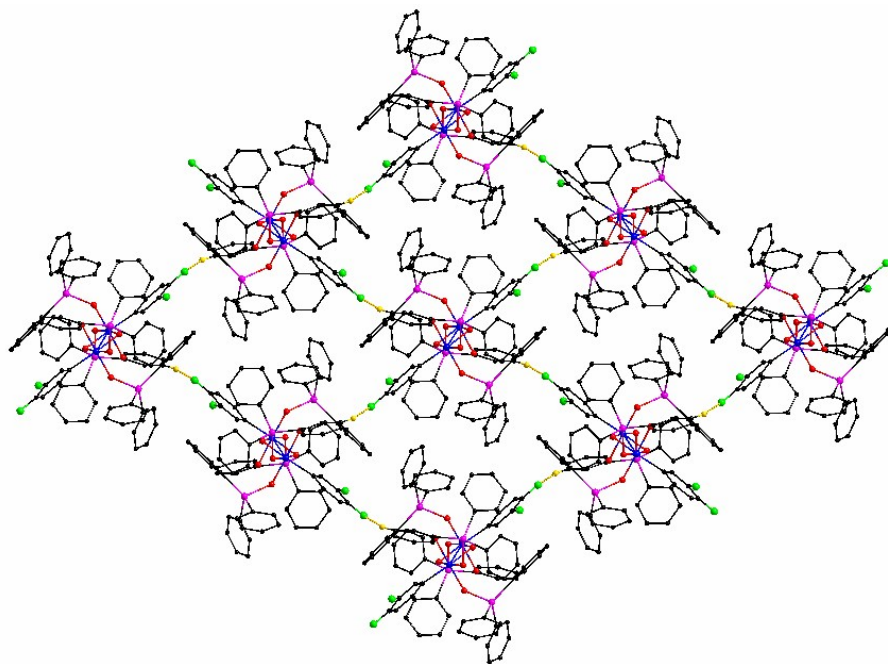

Fig. S10. 2D network structures of complex **4** made up of intermolecular C-H...F interactions.

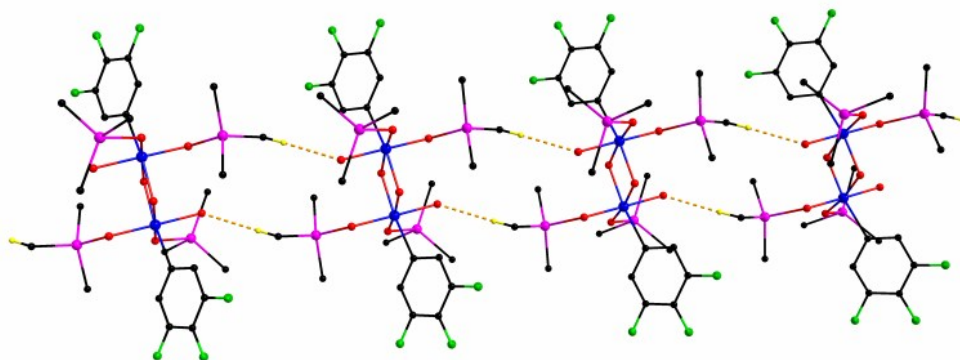

Fig. S11. 1D polymeric chain of complex **5** made up of intermolecular C-H...O interactions.

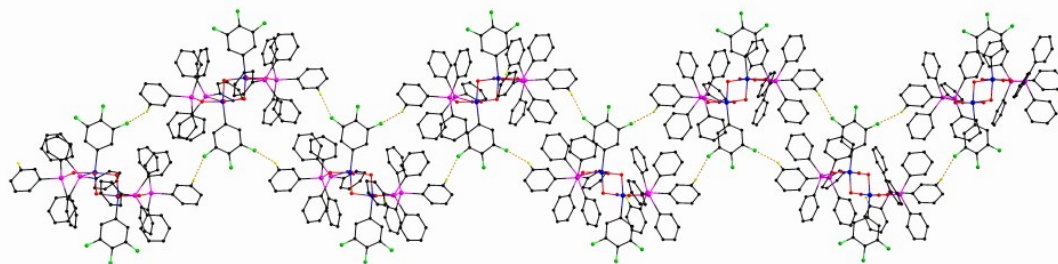

Fig. S12. 1D infinite zigzag chain of complex **6** made up of intermolecular C-H...F interactions.



## $^{119}\text{Sn}$ NMR spectra of complexes 1-6

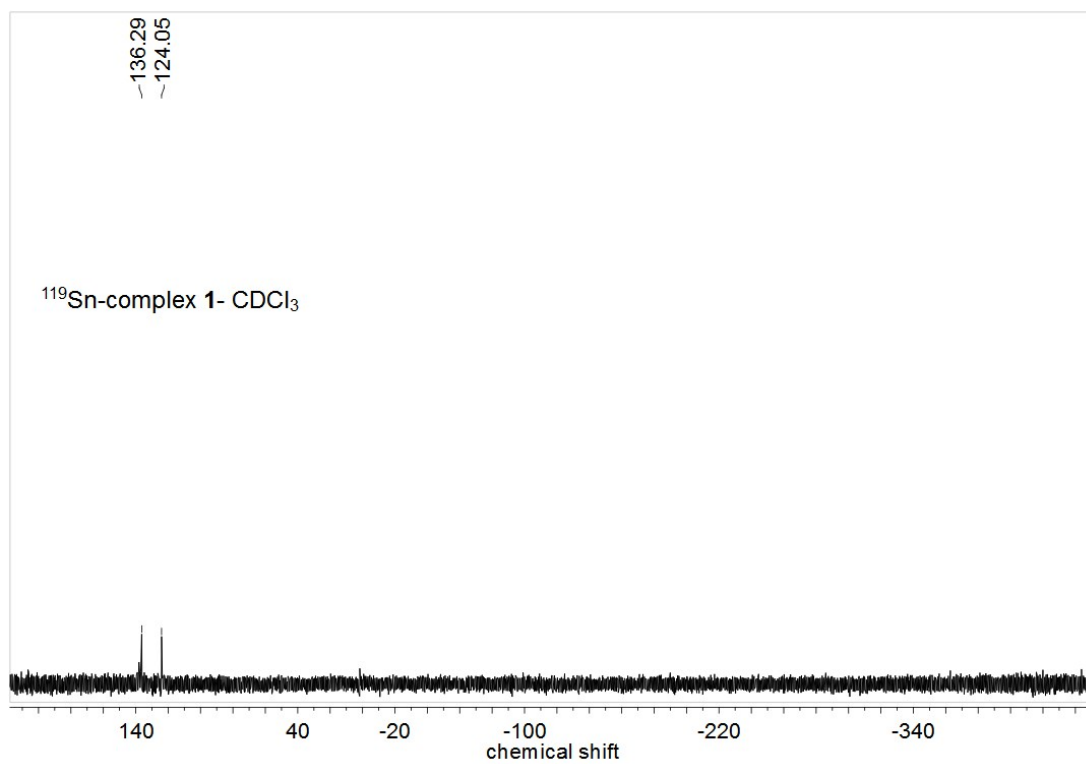

Fig. S13.  $^{119}\text{Sn}$  NMR spectra of complexes 1

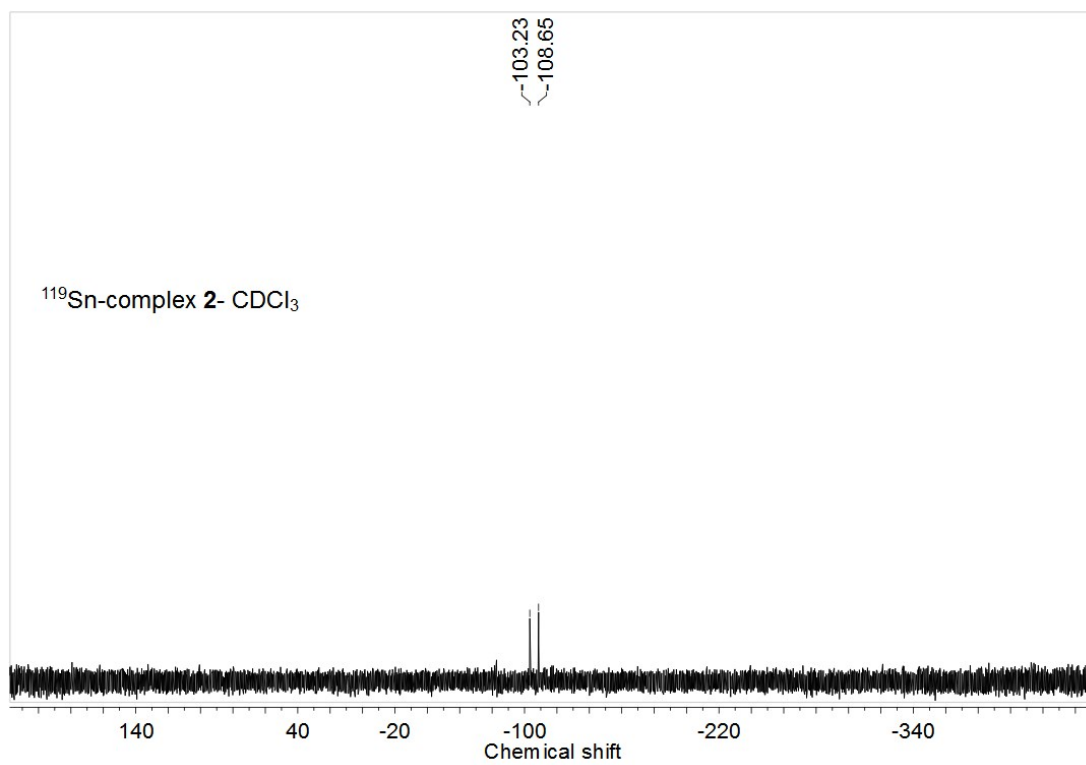

Fig. S14.  $^{119}\text{Sn}$  NMR spectra of complexes 2

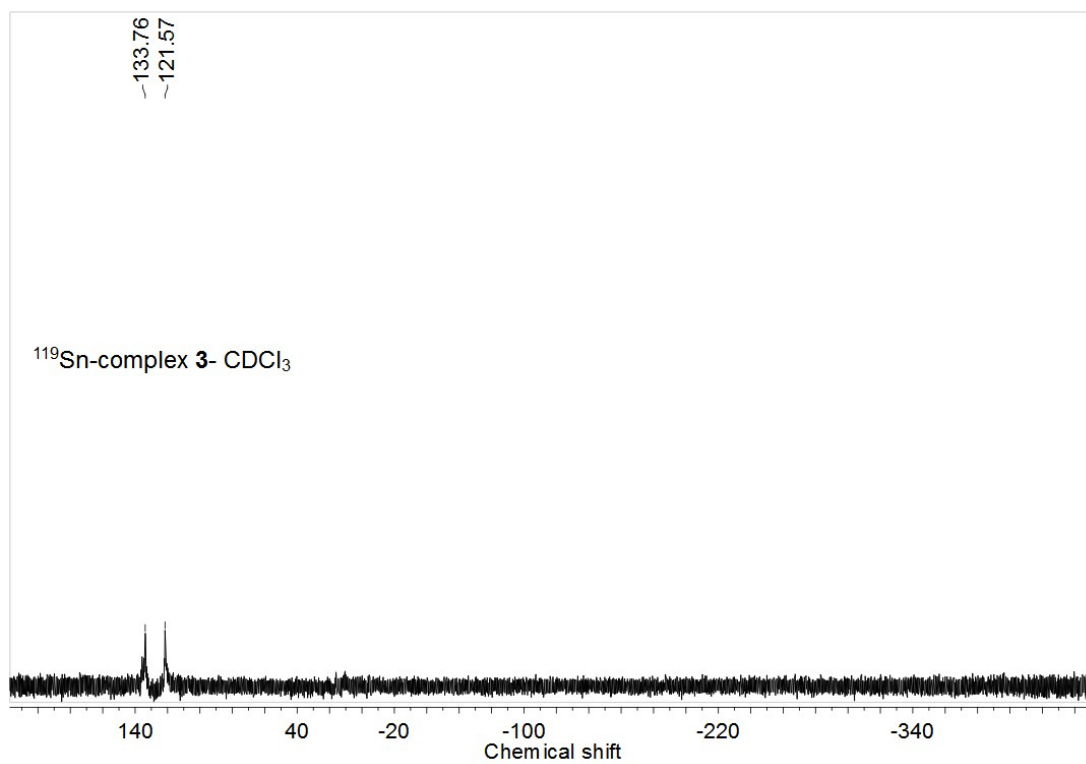

Fig. S15.  $^{119}\text{Sn}$  NMR spectra of complexes **3**

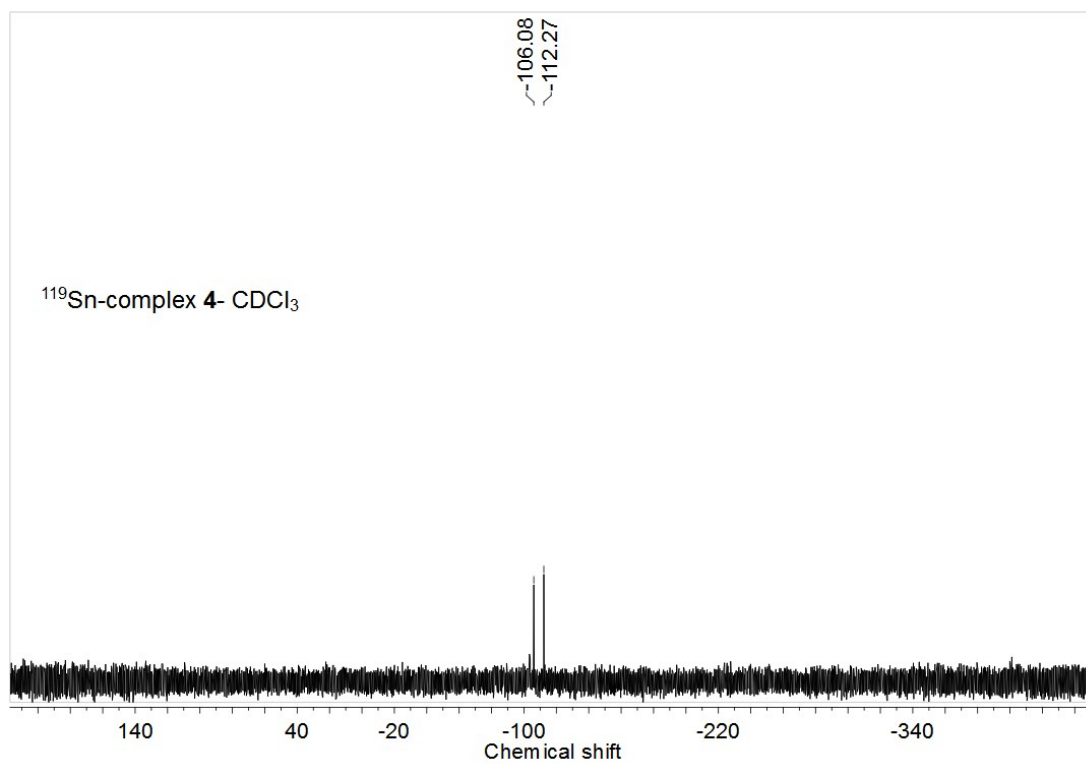

Fig. S16.  $^{119}\text{Sn}$  NMR spectra of complexes **4**

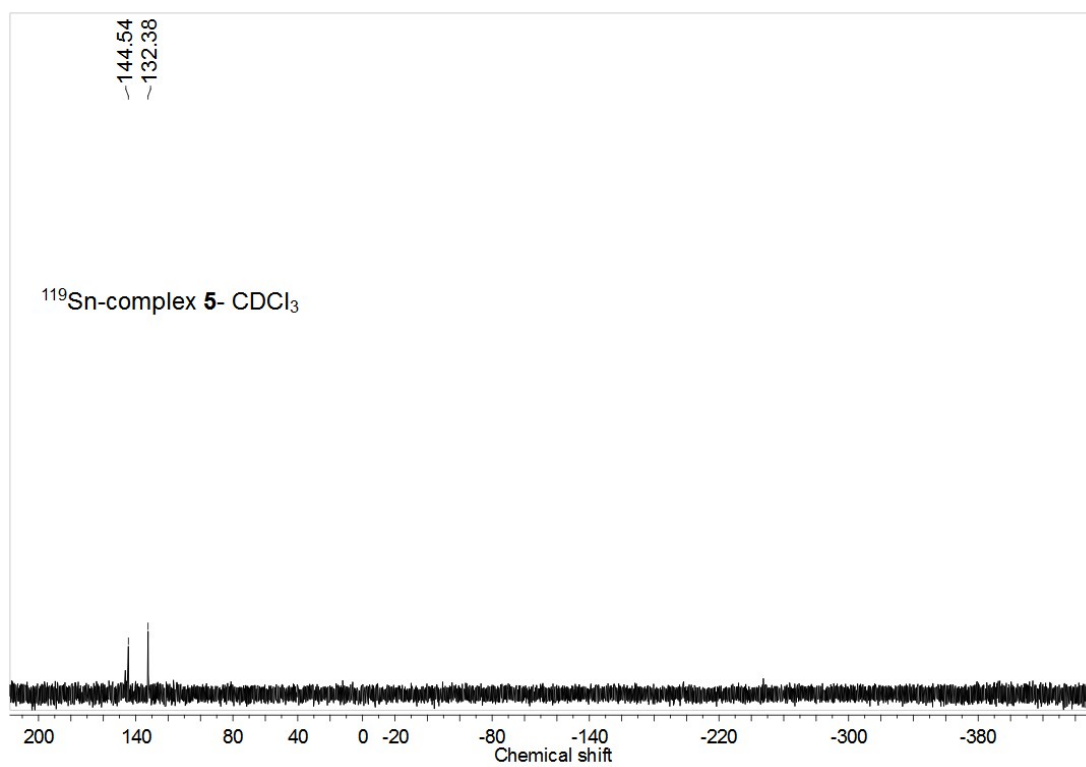

Fig. S17.  $^{119}\text{Sn}$  NMR spectra of complexes **5**

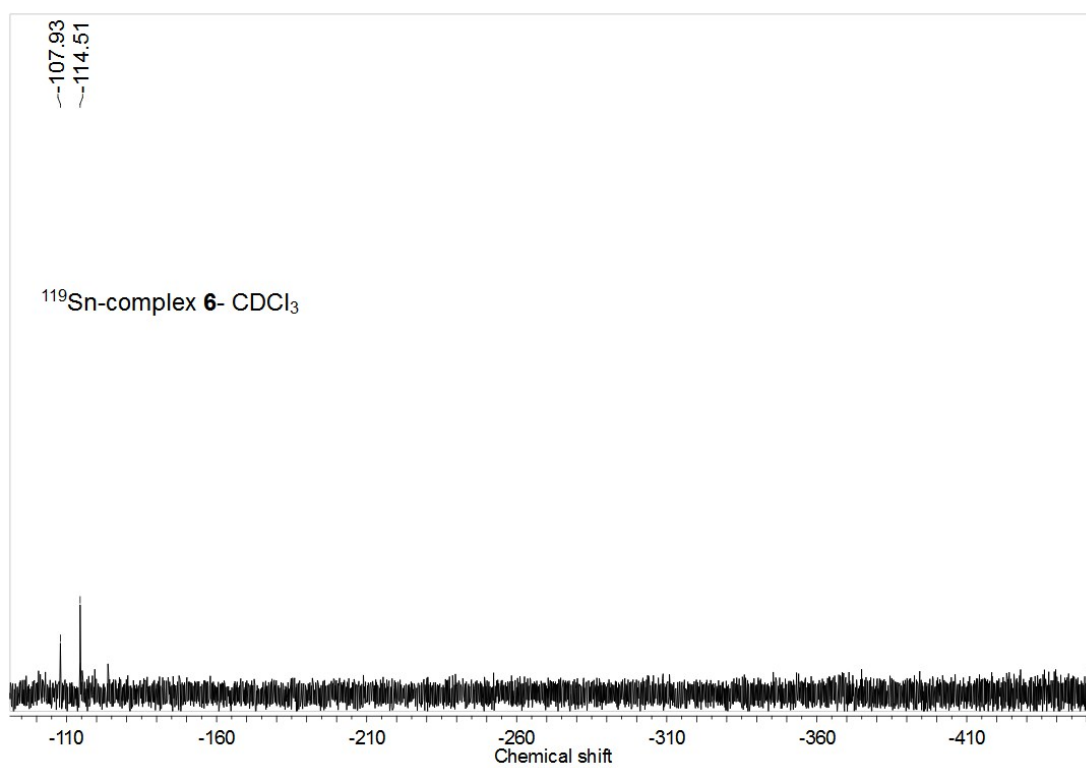

Fig. S18.  $^{119}\text{Sn}$  NMR spectra of complexes **6**
